# Supplementary material for: Intrafibrillar mineralization of type I collagen by micelle-loaded amorphous calcium phosphate nanoparticles
Source: Royal Society of Chemistry journal article supplement (doi:10.1039/d3ra01321a), 2023-01-01
Supplement: d3ra01321a1.pdf [file d3ra01321a1.pdf]

Supporting Material for

**Intrafibrillar mineralization of type I collagen by micelle-loaded  
amorphous calcium phosphate nanoparticles**

Hongyu Xie<sup>a,†</sup>, Jian Sun<sup>b,†</sup>, Fangfang Xie<sup>a,\*\*</sup>, Shengbin He<sup>b\*</sup>,

*a. College of Stomatology, Hospital of Stomatology, Guangxi Medical University,  
Nanning, Guangxi 530021, P. R. China.*

*b. Key Laboratory of Longevity and Aging-related Diseases of Chinese Ministry of  
Education, Guangxi Colleges and Universities Key Laboratory of Biological  
Molecular Medicine Research, School of Basic Medical Sciences, Guangxi Medical  
University, Nanning, Guangxi 530021, P. R. China.*

<sup>†</sup>These authors contributed equally to this work.

\* Corresponding author.

\*\* Corresponding author.

E-mails addresses: comhsb@163.com (Shengbin He); xiedualfang@163.com  
(Fangfang Xie)

This Supporting Information includes **Supplementary Figure S1 and Figure S2.**

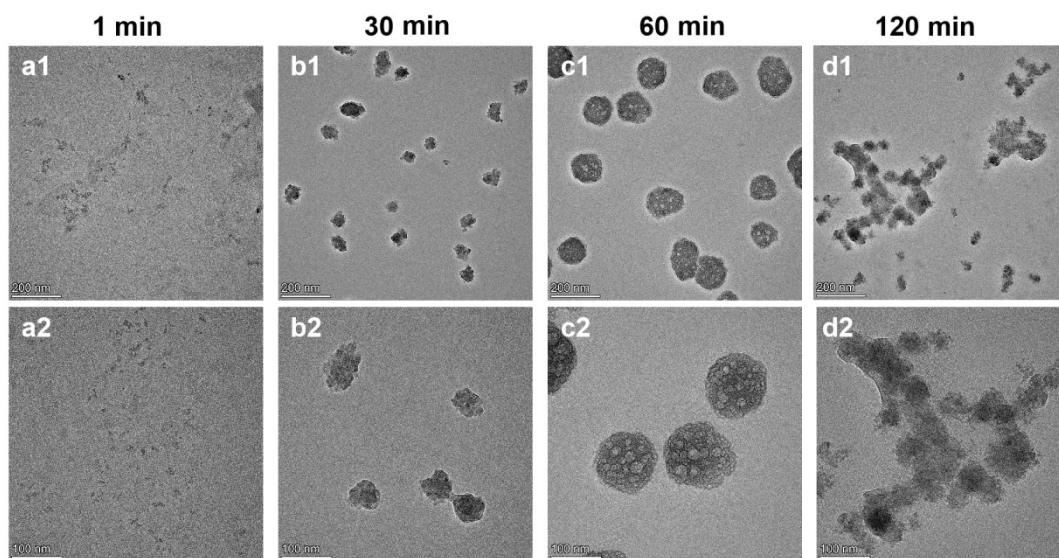

**Supplementary Fig. S1** Representative TEM images of the ACP/CPAMAM with various reaction times.

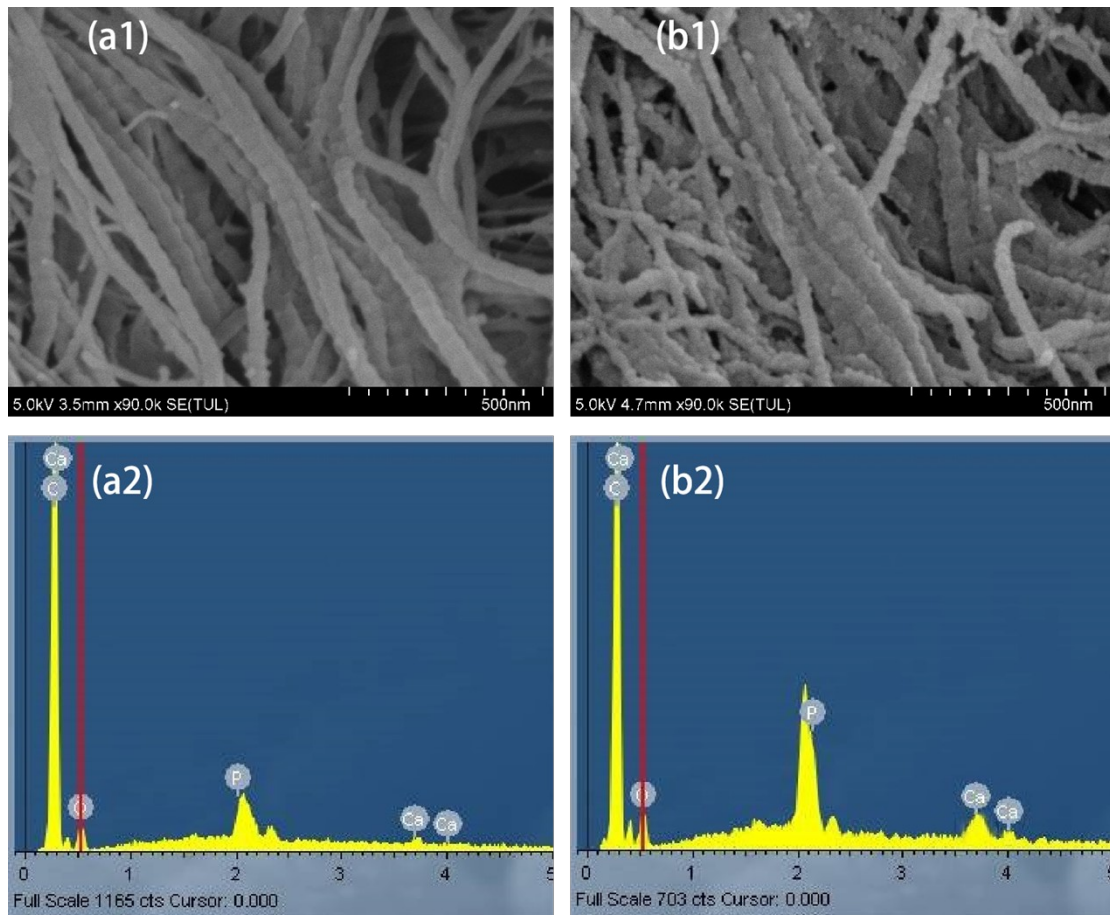

**Supplementary Fig. S2.** TEM image and energy spectrum analysis of the demineralized dentin (a1-a2) and remineralized dentin (b1-b2).
